# Supplementary material
Source: MDPI journal article supplement (https://www.mdpi.com/2304-6740/9/7/54)
Supplement: s1 [file s1]

Article

# Isomeric 4,2':6',4''- and 3,2':6',3''-Terpyridines with Isomeric 4'-Trifluoromethylphenyl Substituents: Effects on the Assembly of Coordination Polymers with [Cu(hfacac)<sub>2</sub>] (Hhfacac = Hexafluoropentane-2,4-dione)

Giacomo Manfroni, Simona S. Capomolla, Alessandro Prescimone, Edwin C. Constable and Catherine E. Housecroft \*

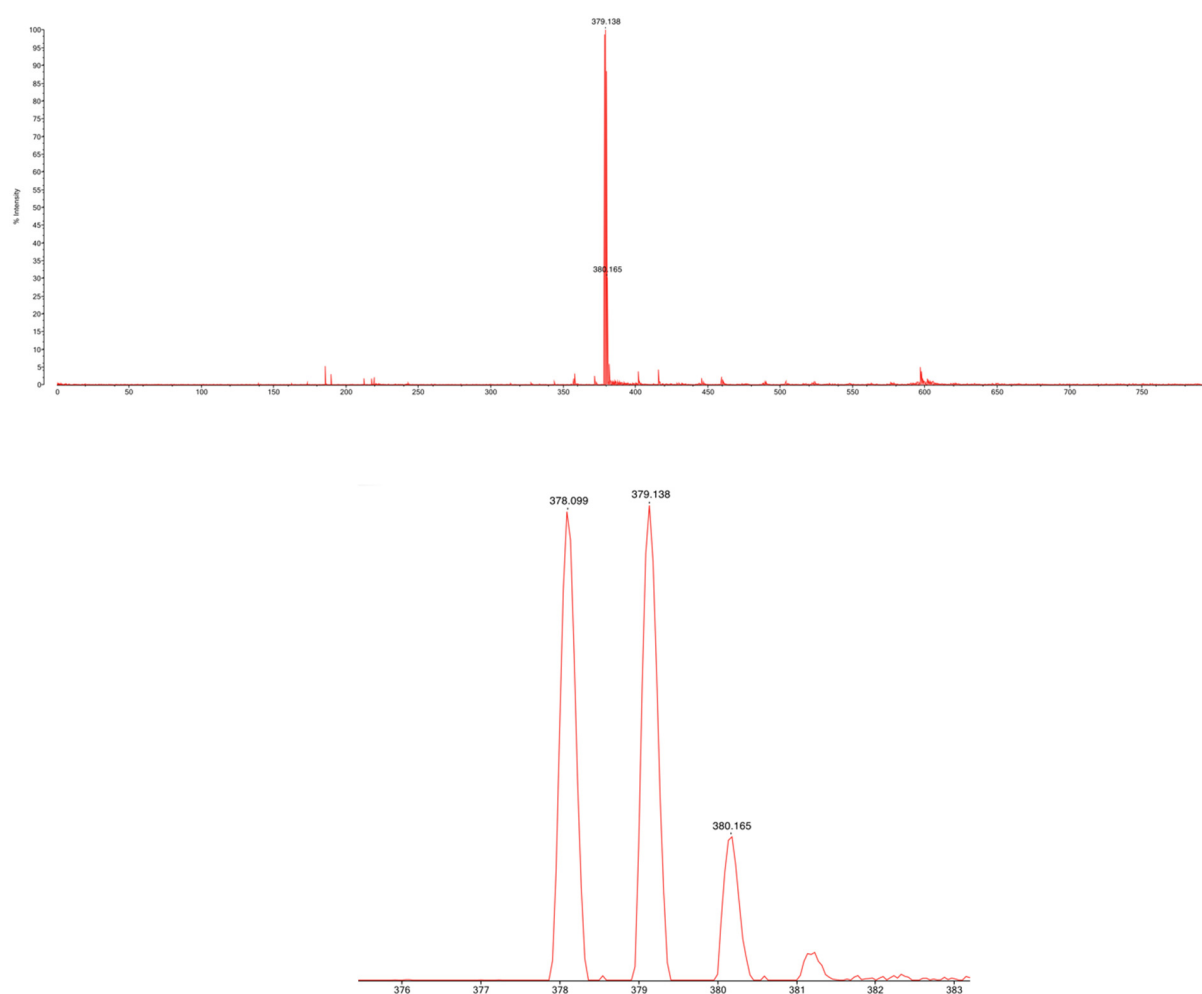

**Figure S1.** The MALDI-TOF mass spectrum of **1**, and expansion of the base peak.

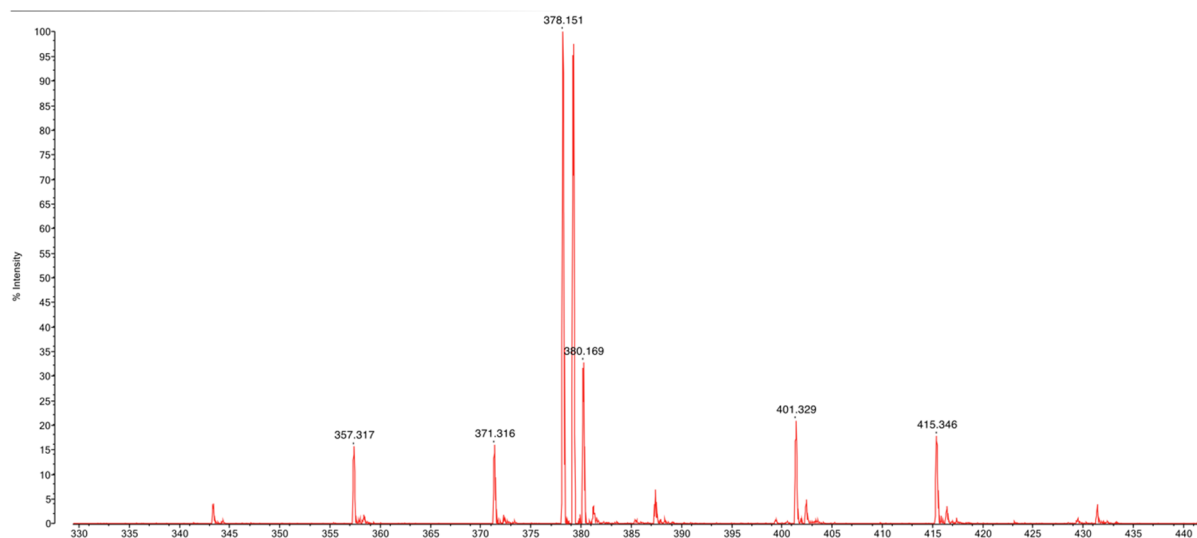

**Figure S2.** The MALDI-TOF mass spectrum of **2**.

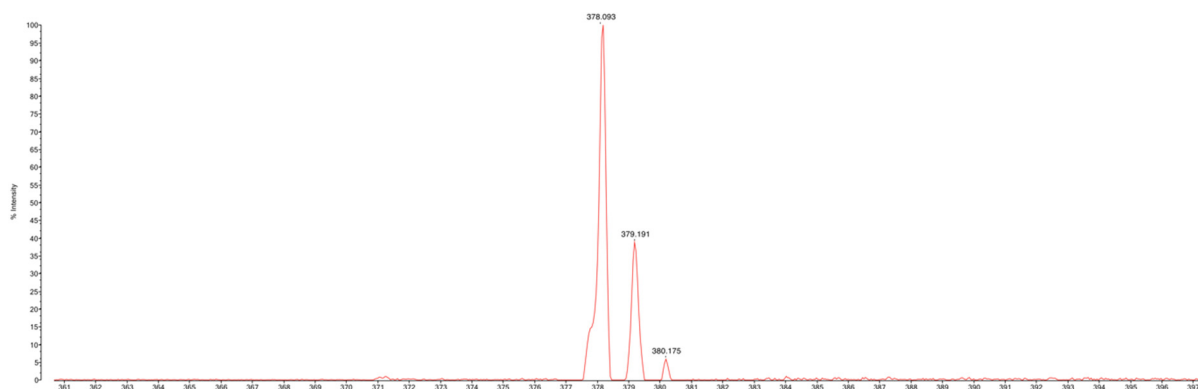

**Figure S3.** The MALDI-TOF mass spectrum of **3**; expansion of the base peak.

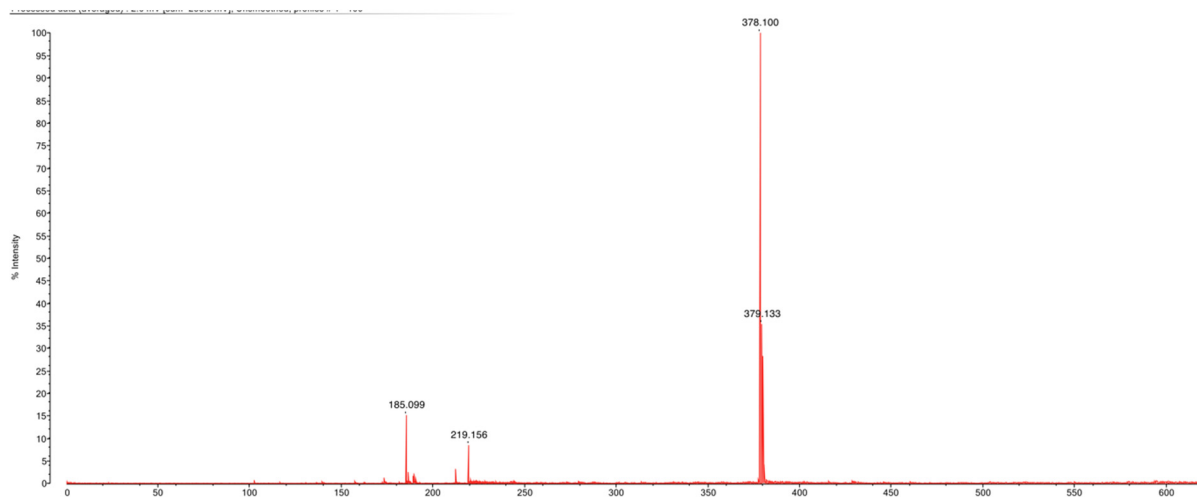

**Figure S4.** The MALDI-TOF mass spectrum of **4**.

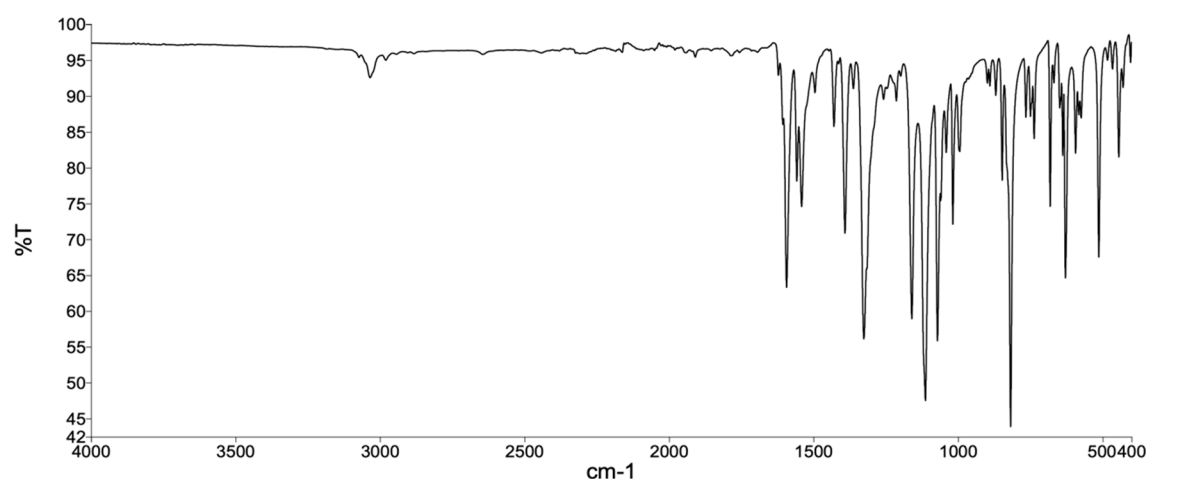

**Figure S5.** The solid-state FT-IR spectrum of **1**.

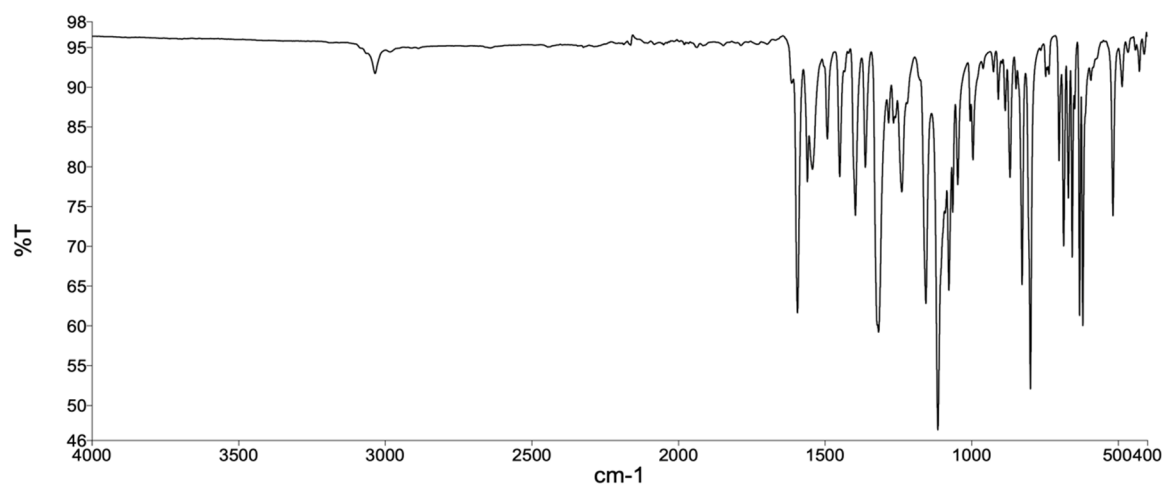

**Figure S6.** The solid-state FT-IR spectrum of **2**.

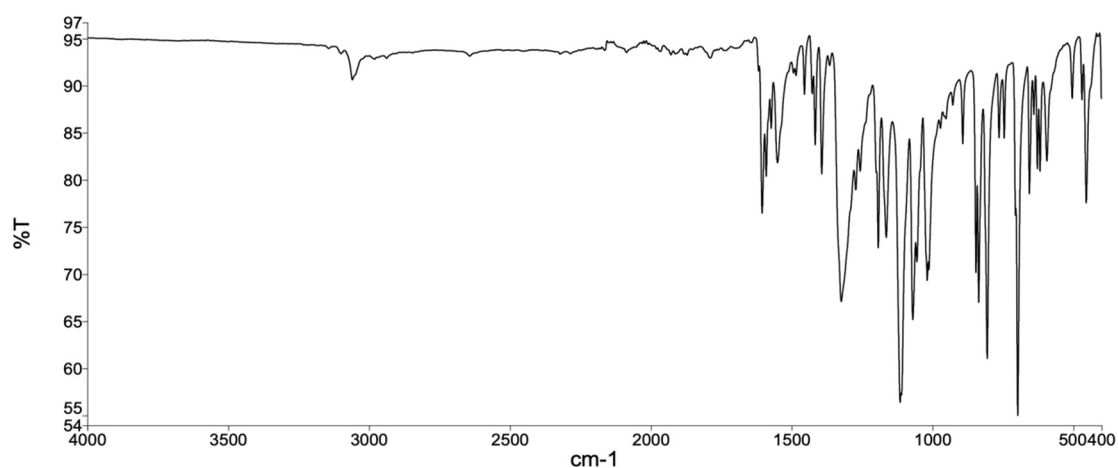

**Figure S7.** The solid-state FT-IR spectrum of **3**.

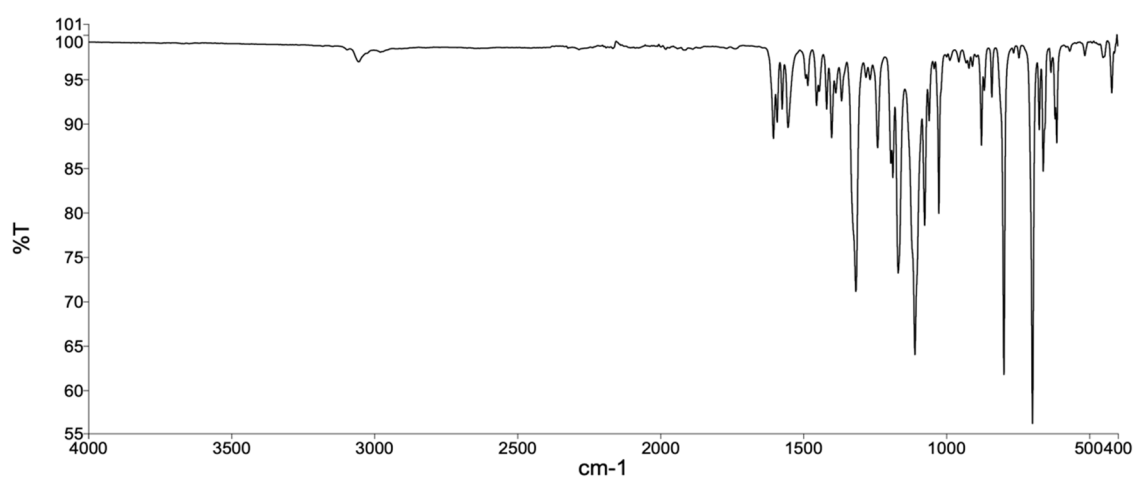

**Figure S8.** The solid-state FT-IR spectrum of **4**.

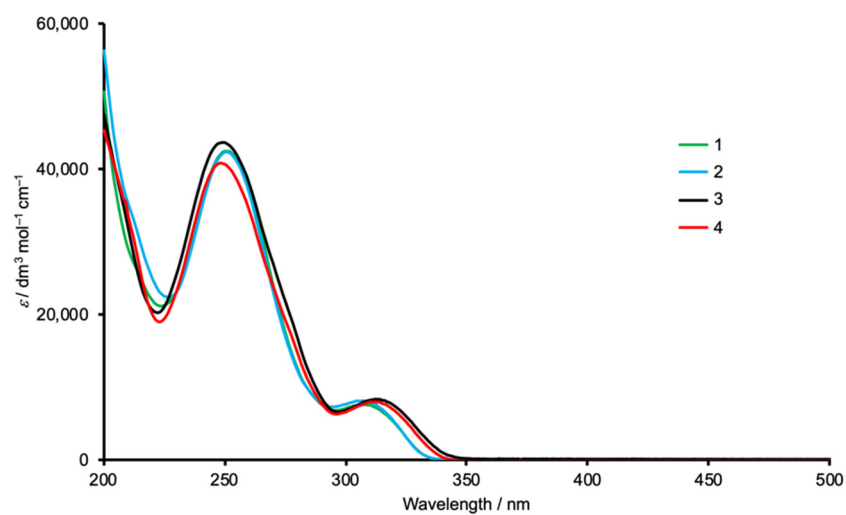

**Figure S9.** Solution absorption spectra of **1–4** in MeCN ( $2 \times 10^{-5}$  mol dm<sup>-3</sup>).

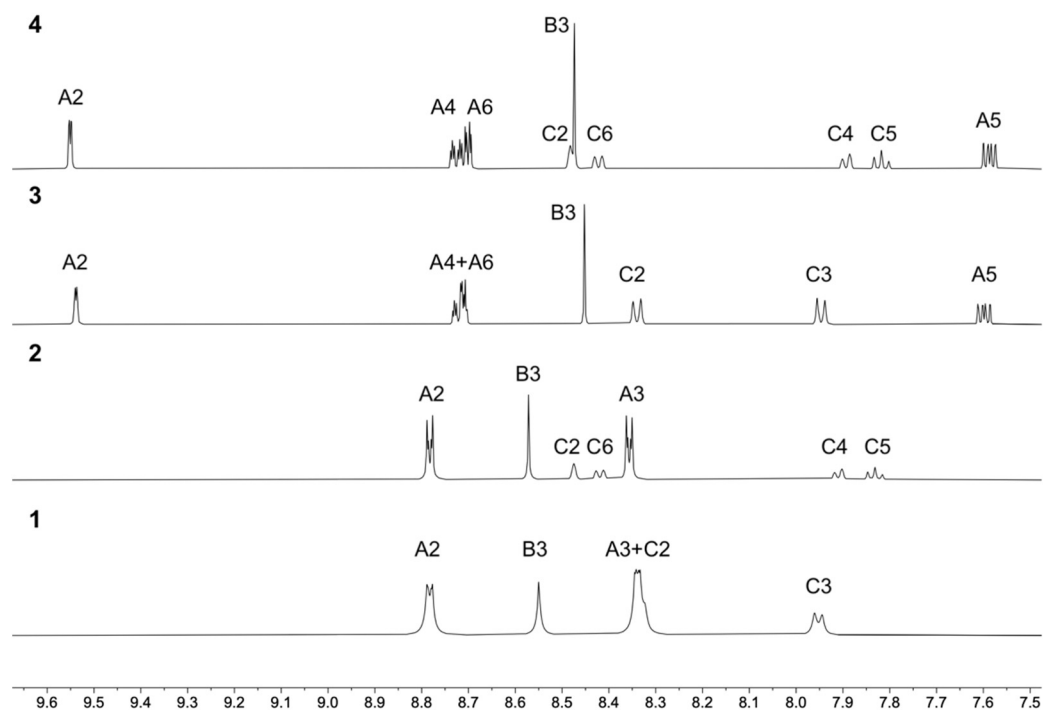

**Figure S10.** A comparison of the  $^1\text{H}$  NMR spectra of compounds **1–4** (500 MHz,  $\text{DMSO}-d_6$ , 298 K). See Scheme 3 for atom labels.

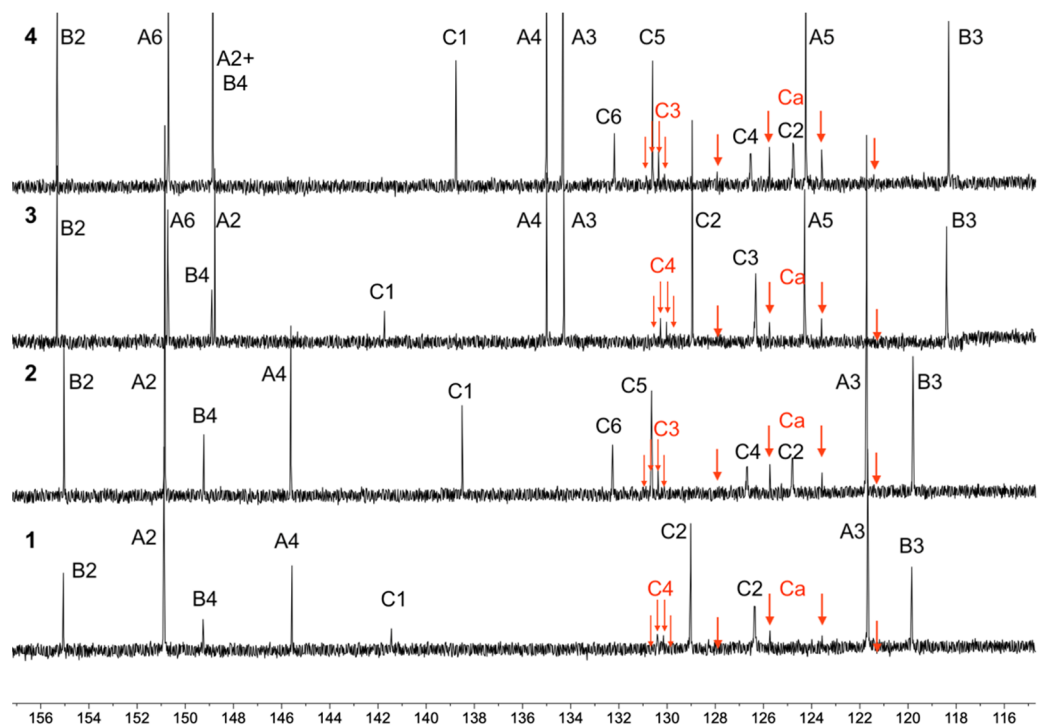

**Figure S11.** A comparison of the  $^{13}\text{C}\{^1\text{H}\}$  NMR spectra of compounds **1–4** (126 MHz,  $\text{DMSO}-d_6$ , 298 K). Quartets ( $J_{\text{CF}}$ ) are emphasized in red. See Scheme 3 for atom labels.

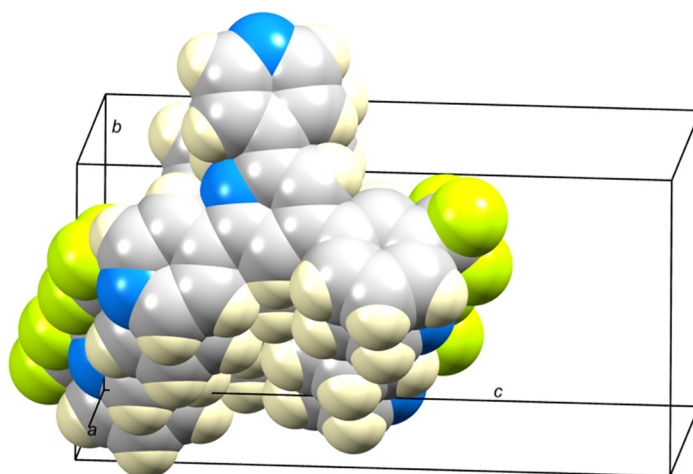

**Figure S12.** Columnar packing of molecules of **2** with an alternating head-to-tail arrangement.

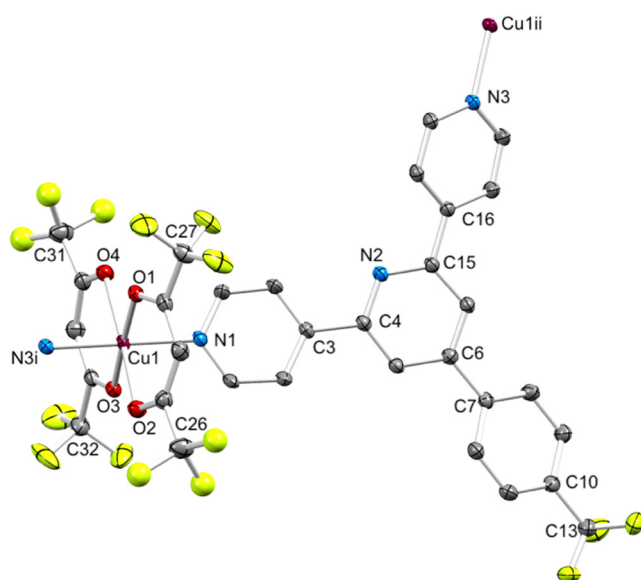

**Figure S13.** Molecular structure of the asymmetric unit in  $[\text{Cu}_2(\text{hfacac})_4(\mathbf{1})_2] \cdot 2n\text{C}_6\text{H}_4\text{Cl}_2$  with symmetry generated atoms (symmetry codes:  $i = 1/2 - x, -y, -1/2 + z$ ;  $ii = 1/2 - x, -y, 1/2 + z$ ). H atoms and solvent molecules are omitted and ellipsoids are plotted at 40% probability. The  $\text{CF}_3$  groups with C26 and C31 were disordered (see Section 3.11) and the F atoms were refined isotropically.

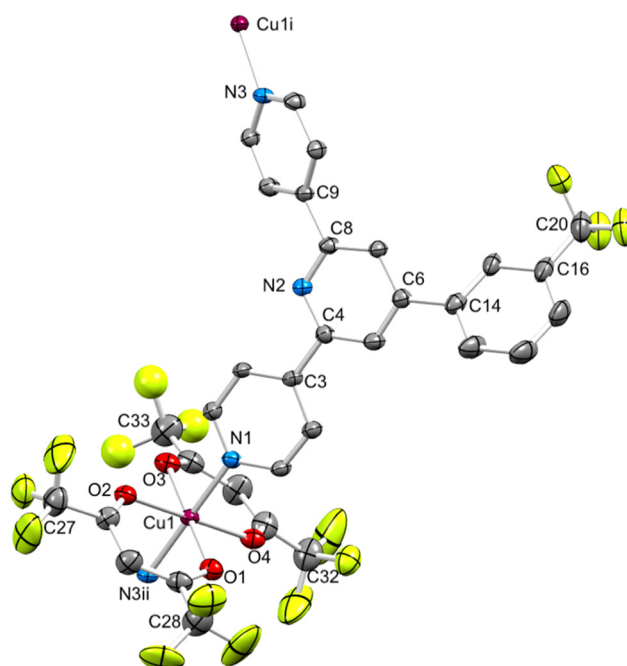

**Figure S14.** Molecular structure of the asymmetric unit in  $[\text{Cu}(\text{hfacac})_2(2)]_n \cdot 2n \text{C}_6\text{H}_5\text{Me}$  with symmetry generated atoms (symmetry codes:  $i = -1+x, -1-y, -1/2+z$ ;  $ii = 1+x, -1-y, 1/2+z$ ). H atoms and solvent molecules are omitted, and ellipsoids are plotted at 40% probability. The  $\text{CF}_3$  group with C33 was disordered (see Section 3.11) and the F atoms were refined isotropically.

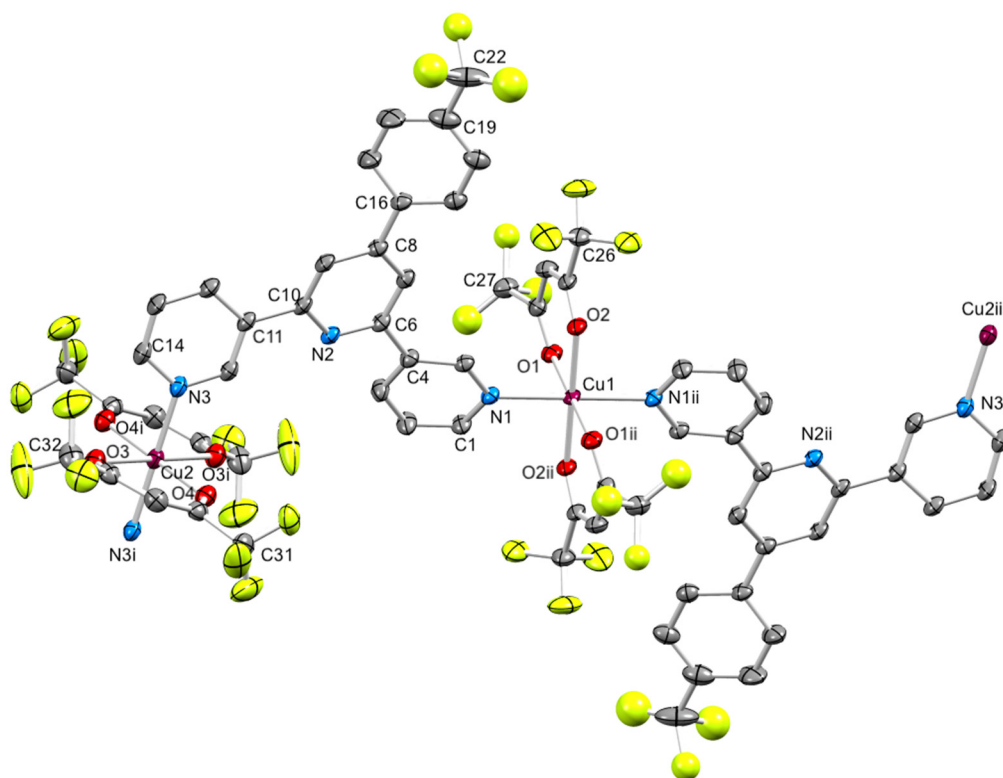

**Figure S15.** Molecular structure of the asymmetric unit in  $[\text{Cu}_2(\text{hfacac})_4(3)_2]_n \cdot n \text{C}_6\text{H}_4\text{Cl}_2$  with symmetry generated atoms (symmetry codes:  $i = 2-x, -y, -z$ ;  $ii = 1-x, 1-y, 1-z$ ;  $iii = -1+x, 1+y, 1+z$ ). H

atoms and solvent molecules are omitted, and ellipsoids are plotted at 40% probability. The CF<sub>3</sub> groups with C22 and C27 were disordered (see Section 3.11) and the F atoms were refined isotropically.

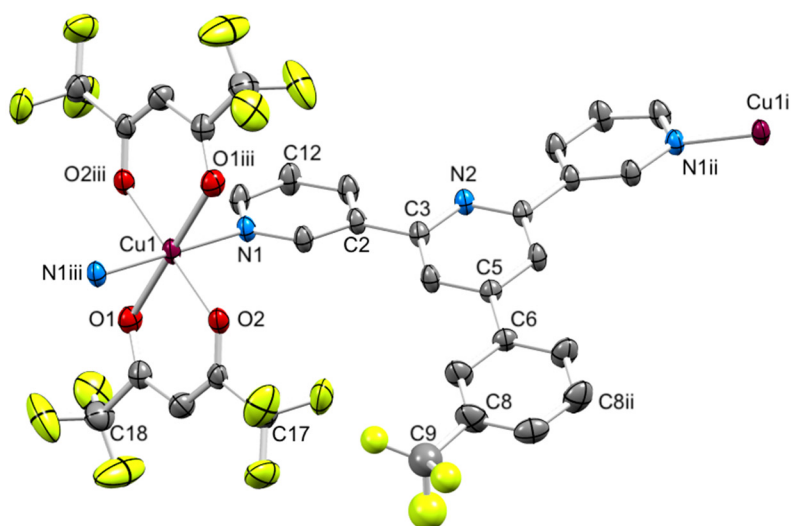

**Figure S16.** Molecular structure of the asymmetric unit in [Cu(hfacac)<sub>2</sub>(4)]<sub>n</sub>·nC<sub>6</sub>H<sub>5</sub>Cl with symmetry generated atoms (symmetry codes: i = 1−x, 1/2+y, 1−z; ii = x, 3/2−y, z; iii = 1−x, 1−y, 1−z). H atoms are omitted, and ellipsoids are plotted at 40% probability. The CF<sub>3</sub> group with C9 is disordered over two sites related by a mirror (see Section 3.11) and was refined isotropically; only one position is shown.

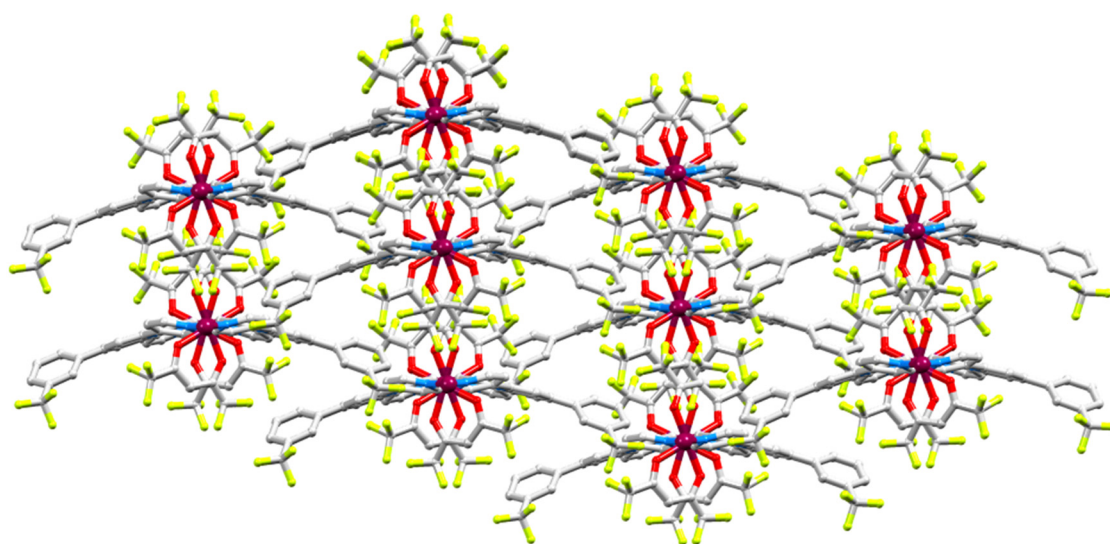

**Figure S17.** Looking along the polymer chains in [Cu(hfacac)<sub>2</sub>(2)]<sub>n</sub>·2nC<sub>6</sub>H<sub>5</sub>Me to illustrate that the 1D-polymers are arranged parallel to one another.



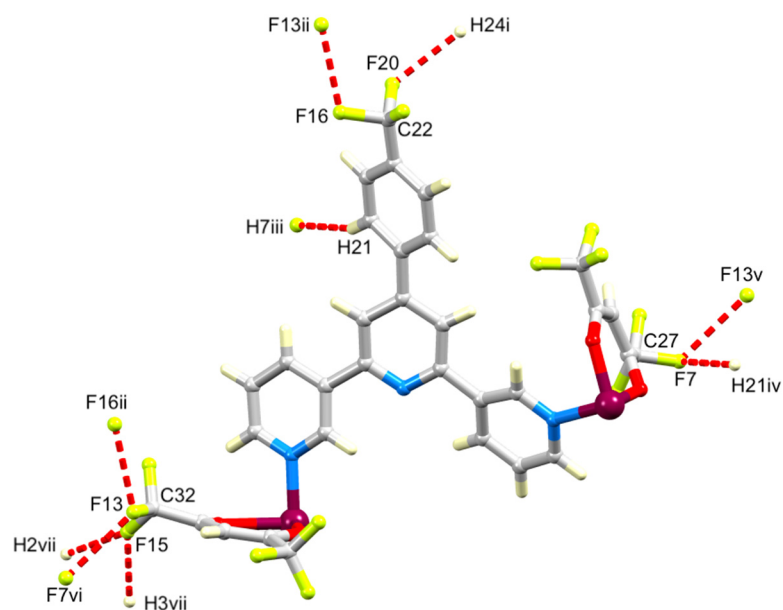

**Figure S18.** Extensive C-F...F-C and C-F...H-C contacts are present in  $[\text{Cu}_2(\text{hfacac})_4(\mathbf{3})_2]_n \cdot n\text{C}_6\text{H}_4\text{Cl}_2$ . Symmetry codes: i =  $2-x, 1-y, 2-z$ ; ii =  $3-x, 1-y, 1-z$ ; iii =  $1+x, y, z$ ; iv =  $-1+x, y, z$ ; v =  $-1+x, y, 1+z$ ; vi =  $1+x, y, -1+z$ ; vii =  $2-x, -y, -z$ . Contact distances: F...F = 2.85 and 2.87 Å; H...F in the range 2.50–2.65 Å. Longer contacts have been ignored.

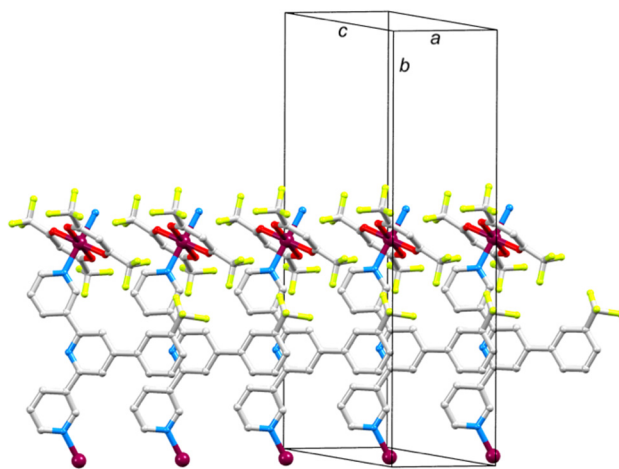

**Figure S19.** Infinite stacks of 3,2':6',3''-tpy domains interconnect 1D-polymer chains in  $[\text{Cu}(\text{hfacac})_2(\mathbf{4})]_n \cdot n\text{C}_6\text{H}_5\text{Cl}$ . See also Figure 8c.

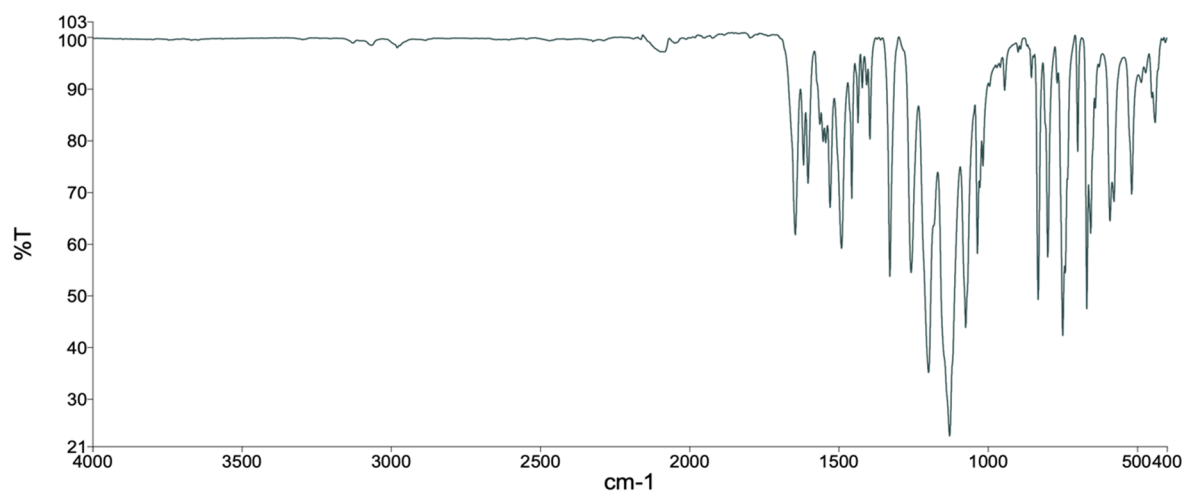

**Figure S20.** The solid-state IR spectrum of  $[\text{Cu}_2(\text{hfacac})_4(\mathbf{1})_2] \cdot 2n\text{C}_6\text{H}_4\text{Cl}_2$ .

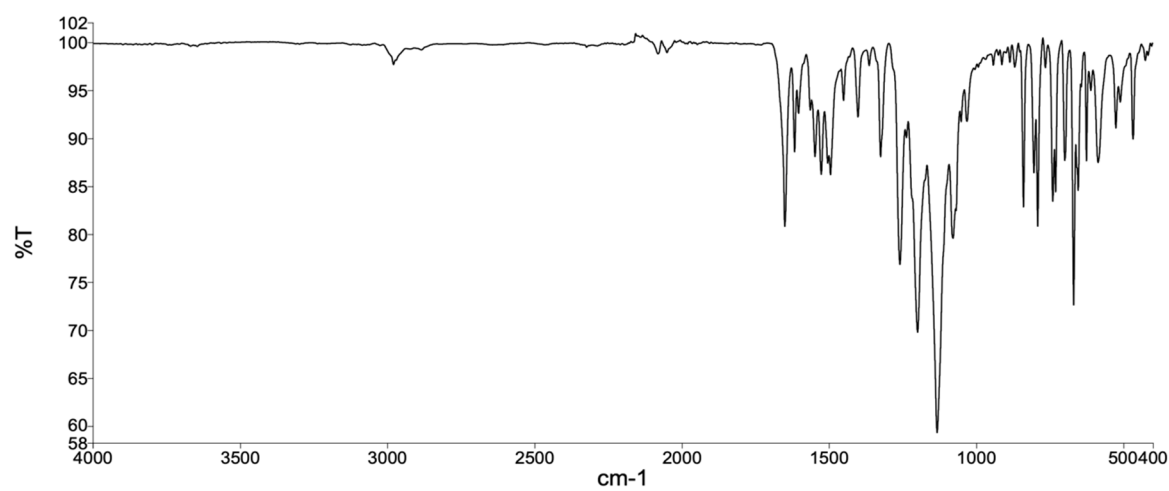

**Figure S21.** The solid-state IR spectrum of  $[\text{Cu}(\text{hfacac})_2(\mathbf{2})] \cdot 2n\text{C}_6\text{H}_5\text{Me}$ .

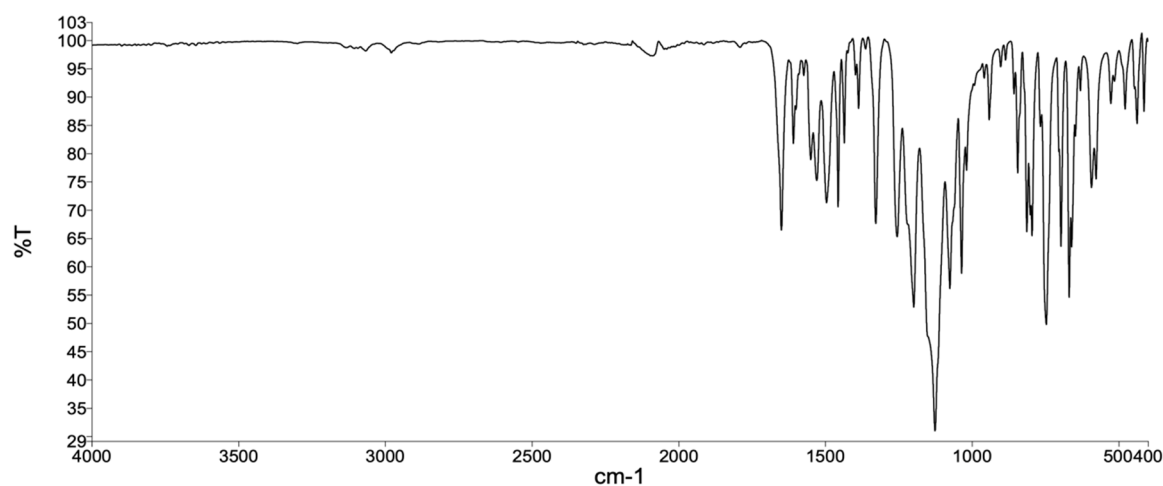

**Figure S22.** The solid-state IR spectrum of  $[\text{Cu}_2(\text{hfacac})_4(\mathbf{3})_2] \cdot n\text{C}_6\text{H}_4\text{Cl}_2$ .

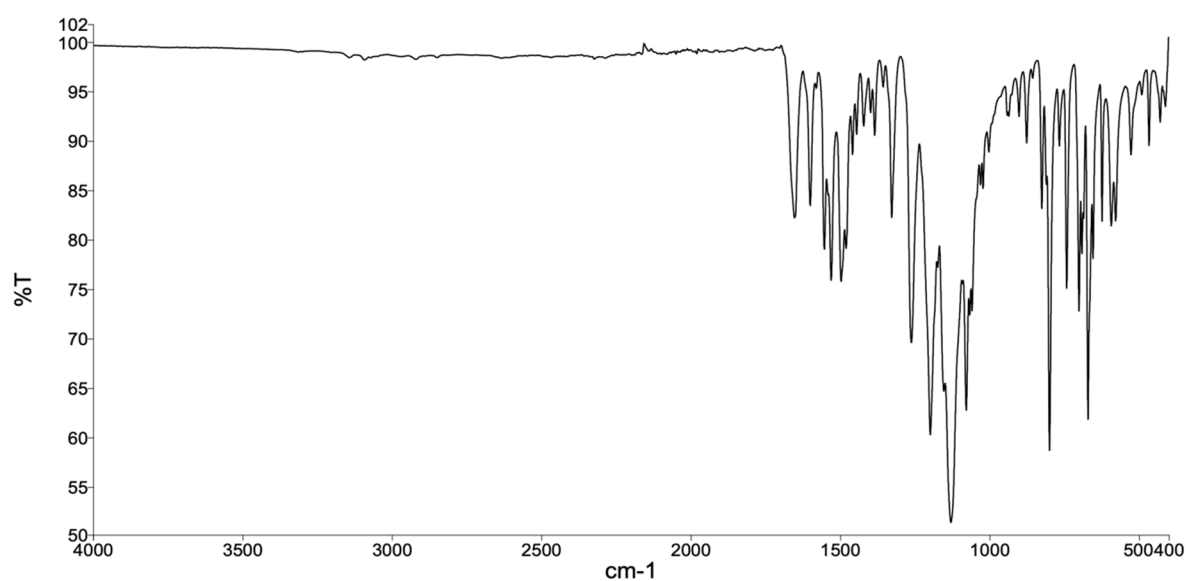

**Figure S23.** The solid-state IR spectrum of  $[\text{Cu}(\text{hfacac})_2(\mathbf{4})]_n \cdot n\text{C}_6\text{H}_5\text{Cl}$ .

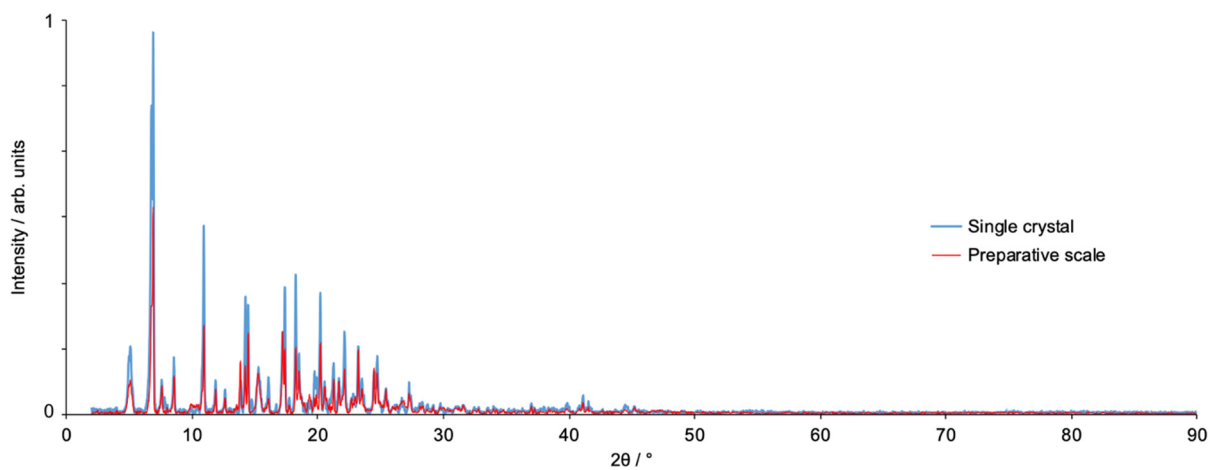

**Figure S24.** A comparison of the PXRD pattern of  $[\text{Cu}_2(\text{hfacac})_4(\mathbf{2})_2]_n$  prepared on a preparative scale, and the pattern from the bulk single crystals of  $[\text{Cu}(\text{hfacac})_2(\mathbf{2})]_n \cdot 2n\text{C}_6\text{H}_5\text{Me}$ . The difference in solvent arises from drying the synthesized sample. The single crystals were not dried and were ground before PXRD.

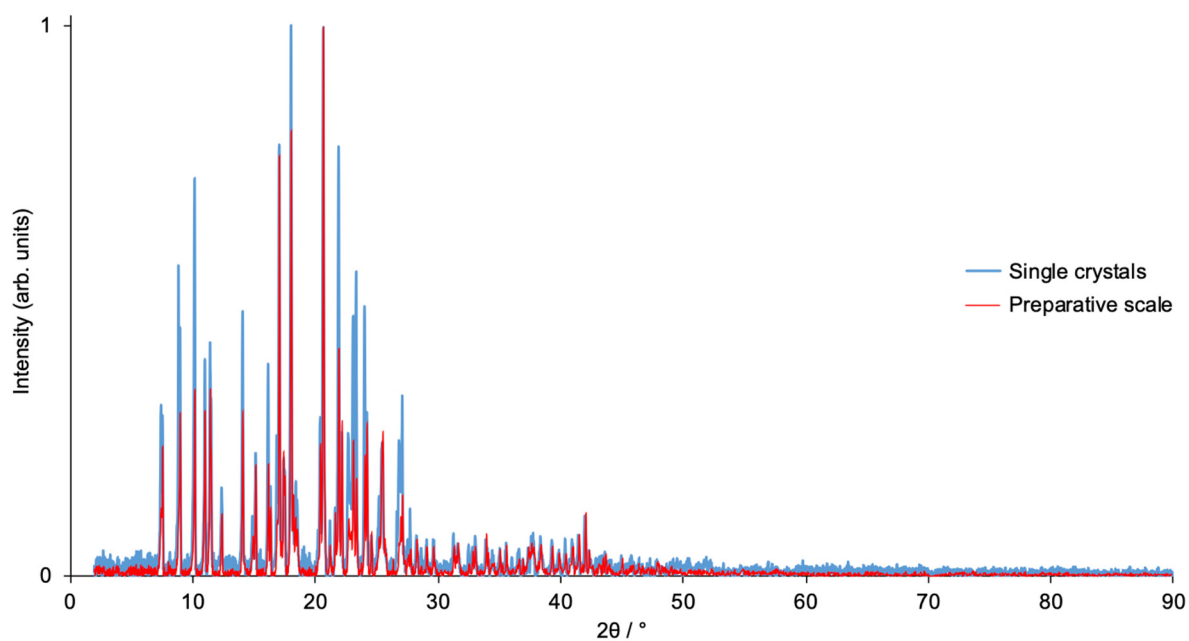

**Figure S25.** A comparison of the PXRd pattern of  $[\text{Cu}_2(\text{hfacac})_4(\mathbf{3})_2]_n$  prepared on a preparative scale, and the pattern from the bulk single crystals of  $[\text{Cu}_2(\text{hfacac})_4(\mathbf{3})_2]_n \cdot n\text{C}_6\text{H}_4\text{Cl}_2$ . The difference in solvent arises from drying the synthesized sample.

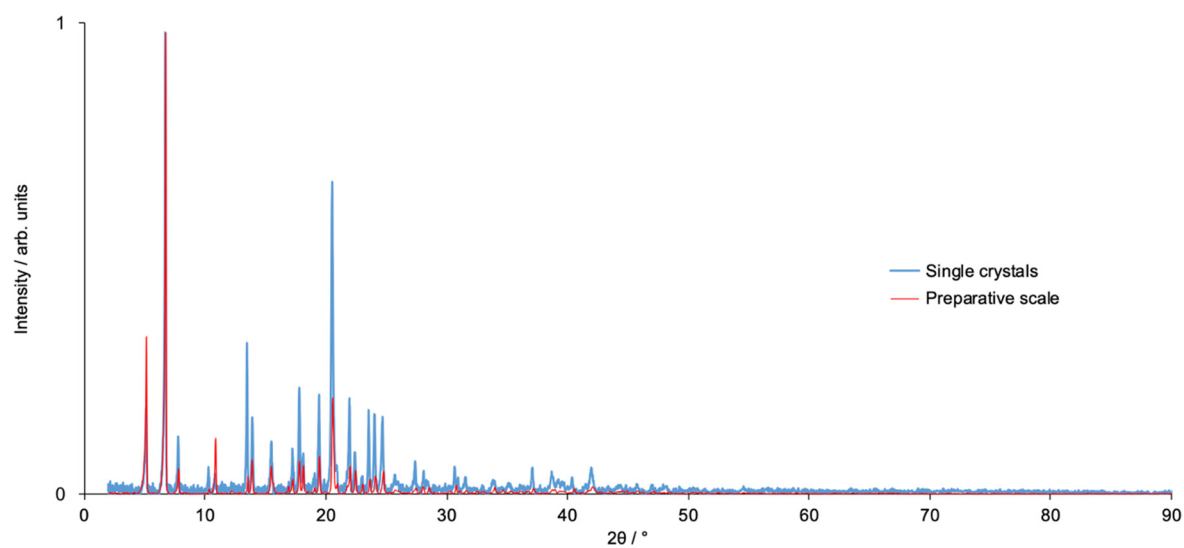

**Figure S26.** A comparison of the PXRd pattern of  $[\text{Cu}_2(\text{hfacac})_4(\mathbf{4})_2]_n$  prepared on a preparative scale, and that from the bulk single crystals of  $[\text{Cu}_2(\text{hfacac})_4(\mathbf{4})_2]_n \cdot n\text{C}_6\text{H}_5\text{Cl}$ . The difference in solvent arises from drying the synthesized sample.
